# Supplementary material for: Efficient Pyrolysis of Low-Density Polyethylene for Regulatable Oil and Gas Products by ZSM-5, HY and MCM-41 Catalysts
Source: MDPI journal article supplement (doi:10.3390/catal13020382), 2023-02-09
Supplement: s1 [file s1]

# Supplementary Material

## Efficient pyrolysis of low-density polyethylene for regulatable oil and gas products by ZSM-5, HY and MCM-41 catalysts

Ting Liu<sup>1</sup>, Yincui Li<sup>1</sup>, Yifan Zhou<sup>2</sup>, Shengnan Deng<sup>1</sup>, Huawei Zhang<sup>1\*</sup>

<sup>1</sup> School of Environmental and Municipal Engineering, Qingdao University of Technology, Qingdao 266033, China

<sup>2</sup> College of Chemical and Biological Engineering, Shandong University of Science and Technology, Qingdao 266590, China

\* Correspondence: sdkdzhw@163.com; Tel.: +86-0532-85071133

## 2. Materials and methods

### 2.3 Characterization

The N<sub>2</sub> adsorption-desorption isotherm of the adsorbent was measured at 77 K using the ASAP 2020 volume adsorption analyzer. The Brunauer-Emmett-Teller (BET) method was used to determine the specific surface area. The pore size distribution map is calculated by the Barrett-Joyner-Halenda (BJH) method. The morphology and structure of ZSM-5, HY and MCM-41 were examined by scanning electron microscope (SEM, JEOL, JSM-6700F, Japan) and transmission electron microscope (HRTEM, JEOL, JEM-2100F, Japan). The acidity values for the various catalysts were determined by NH<sub>3</sub>-TPD (ChemiSorb 2920, Micromeritics Instrument Corporation, USA), the experimental samples were first heated to 500 °C in a helium atmosphere of 50 cm<sup>3</sup>/min and stayed for 1 h. Then the temperature was lowered to 100 °C, and the ammonia was absorbed for 90 min to saturation at the ammonia flow rate of 35 cm<sup>3</sup>/min. The samples were then purged at the same temperature for 120 min under continuous helium flow. Finally, the samples were heated to 600 °C in helium atmosphere at a heating rate of 10 °C/min. The desorbed ammonia gas in this process was detected by mass spectrometry.

### **3. Results and discussion**

#### **Tables:**

**Table S1.** Liquid product composition of LDPE at different temperatures.

**Table S2.** Liquid product composition of LDPE at different temperatures.

**Table S3.** Liquid phase GC-MS table of catalytic pyrolysis of LDPE by ZSM-5 molecular sieve at 500 °C.

**Table S4.** Liquid phase GC-MS table of catalytic pyrolysis of LDPE by HY molecular sieve at 500 °C.

**Table S5.** Liquid phase GC-MS table of catalytic pyrolysis of LDPE by MCM-41 molecular sieve at 500 °C.

**Table S1.** Liquid phase products of LDPE pyrolysis at different temperatures.

| component                       | respective percentages (%) |         |         |         |
|---------------------------------|----------------------------|---------|---------|---------|
|                                 | 500 ° C                    | 550 ° C | 600 ° C | 650 ° C |
| C <sub>7</sub> H <sub>8</sub>   | 0.13                       | 0.16    | 0.19    | 0.49    |
| C <sub>8</sub> H <sub>16</sub>  | 0.03                       | 0.09    | 0.50    | 1.20    |
| C <sub>8</sub> H <sub>18</sub>  | 0.04                       | 0.12    | 0.32    | 0.50    |
| C <sub>8</sub> H <sub>10</sub>  | 0.04                       | 0.15    | 0.20    | 0.25    |
| C <sub>9</sub> H <sub>18</sub>  | 0.06                       | 0.10    | 0.41    | 0.90    |
| C <sub>9</sub> H <sub>20</sub>  | 0.07                       | 0.23    | 0.56    | 1.20    |
| C <sub>10</sub> H <sub>20</sub> | 0.11                       | 0.98    | 1.00    | 1.57    |
| C <sub>10</sub> H <sub>22</sub> | 0.16                       | 0.12    | 1.16    | 1.30    |
| C <sub>11</sub> H <sub>22</sub> | 0.93                       | 0.53    | 1.29    | 1.75    |
| C <sub>11</sub> H <sub>24</sub> | 0.50                       | 0.77    | 1.64    | 1.99    |
| C <sub>12</sub> H <sub>22</sub> | 0.37                       | 1.11    | 0.28    | 0.35    |
| C <sub>12</sub> H <sub>24</sub> | 0.58                       | 0.18    | 1.49    | 1.89    |
| C <sub>12</sub> H <sub>26</sub> | 1.19                       | 1.06    | 1.91    | 1.86    |
| C <sub>13</sub> H <sub>24</sub> | 0.35                       | 1.49    | 0.32    | 0.44    |
| C <sub>13</sub> H <sub>26</sub> | 1.72                       | 0.23    | 2.06    | 2.44    |
| C <sub>13</sub> H <sub>28</sub> | 2.33                       | 1.43    | 1.89    | 1.99    |
| C <sub>14</sub> H <sub>26</sub> | 0.47                       | 1.88    | 0.39    | 0.53    |
| C <sub>14</sub> H <sub>28</sub> | 2.17                       | 2.36    | 2.53    | 2.94    |
| C <sub>14</sub> H <sub>30</sub> | 1.18                       | 2.42    | 1.97    | 2.08    |
| C <sub>15</sub> H <sub>28</sub> | 0.44                       | 1.93    | 0.41    | 0.53    |
| C <sub>15</sub> H <sub>30</sub> | 2.01                       | 0.33    | 2.44    | 3.37    |
| C <sub>15</sub> H <sub>32</sub> | 2.39                       | 2.18    | 2.26    | 2.27    |
| C <sub>16</sub> H <sub>30</sub> | 0.57                       | 0.55    | 0.50    | 0.55    |
| C <sub>16</sub> H <sub>32</sub> | 2.64                       | 0.43    | 2.36    | 2.76    |
| C <sub>16</sub> H <sub>34</sub> | 2.26                       | 2.54    | 2.29    | 2.24    |
| C <sub>17</sub> H <sub>32</sub> | 0.48                       | 2.43    | 0.41    | 0.49    |
| C <sub>17</sub> H <sub>34</sub> | 2.36                       | 0.36    | 2.47    | 2.56    |
| C <sub>17</sub> H <sub>36</sub> | 2.05                       | 2.47    | 2.19    | 2.11    |
| C <sub>18</sub> H <sub>34</sub> | 0.49                       | 2.38    | 0.46    | 0.53    |
| C <sub>18</sub> H <sub>36</sub> | 2.32                       | 2.46    | 2.38    | 2.47    |
| C <sub>18</sub> H <sub>38</sub> | 1.79                       | 2.47    | 2.17    | 1.99    |
| C <sub>19</sub> H <sub>36</sub> | 0.34                       | 2.39    | 0.37    | 0.42    |
| C <sub>19</sub> H <sub>38</sub> | 3.15                       | 0.47    | 2.78    | 3.23    |
| C <sub>19</sub> H <sub>40</sub> | 2.69                       | 2.70    | 2.22    | 1.96    |
| C <sub>20</sub> H <sub>38</sub> | 0.42                       | 2.95    | 0.40    | 0.45    |
| C <sub>20</sub> H <sub>40</sub> | 2.77                       | 0.49    | 2.39    | 2.81    |
| C <sub>20</sub> H <sub>42</sub> | 3.04                       | 2.72    | 2.29    | 1.93    |
| C <sub>21</sub> H <sub>40</sub> | 0.32                       | 0.67    | 0.46    | 0.41    |
| C <sub>21</sub> H <sub>42</sub> | 2.99                       | 2.50    | 2.46    | 2.71    |
| C <sub>21</sub> H <sub>44</sub> | 2.91                       | 2.76    | 2.39    | 2.16    |
| C <sub>22</sub> H <sub>42</sub> | 0.53                       | 2.82    | 0.72    | 0.81    |
| C <sub>22</sub> H <sub>44</sub> | 2.80                       | 2.58    | 3.34    | 3.52    |

|                                 |        |        |        |        |
|---------------------------------|--------|--------|--------|--------|
| C <sub>22</sub> H <sub>46</sub> | 4.55   | 2.65   | 2.90   | 1.96   |
| C <sub>23</sub> H <sub>44</sub> | 2.36   | 3.39   | 0.73   | 0.41   |
| C <sub>23</sub> H <sub>46</sub> | 3.57   | 0.63   | 2.30   | 2.16   |
| C <sub>23</sub> H <sub>48</sub> | 3.46   | 2.57   | 2.65   | 1.95   |
| C <sub>24</sub> H <sub>48</sub> | 2.33   | 2.40   | 2.75   | 2.89   |
| C <sub>24</sub> H <sub>50</sub> | 3.03   | 3.02   | 2.60   | 1.70   |
| C <sub>25</sub> H <sub>50</sub> | 3.36   | 3.00   | 1.88   | 1.49   |
| C <sub>25</sub> H <sub>52</sub> | 3.12   | 2.37   | 2.08   | 1.51   |
| C <sub>26</sub> H <sub>52</sub> | 1.95   | 2.80   | 2.25   | 2.12   |
| C <sub>26</sub> H <sub>54</sub> | 2.59   | 1.90   | 2.53   | 1.85   |
| C <sub>27</sub> H <sub>54</sub> | 2.01   | 2.28   | 2.12   | 1.59   |
| C <sub>27</sub> H <sub>56</sub> | 3.24   | 2.04   | 2.52   | 2.34   |
| C <sub>28</sub> H <sub>56</sub> | 2.82   | 2.71   | 2.01   | 1.51   |
| C <sub>28</sub> H <sub>58</sub> | 1.24   | 1.90   | 2.96   | 2.19   |
| C <sub>29</sub> H <sub>60</sub> | 2.76   | 3.15   | 3.44   | 3.29   |
| C <sub>30</sub> H <sub>62</sub> | 2.02   | 2.52   | 2.87   | 1.89   |
| others                          | 1.40   | 1.68   | 1.14   | 1.20   |
| Total                           | 100.00 | 100.00 | 100.00 | 100.00 |

**Table S2.** Liquid product composition of LDPE at different temperatures.

| component | respective percentages (%) |         |         |         |
|-----------|----------------------------|---------|---------|---------|
|           | 500 ° C                    | 550 ° C | 600 ° C | 650 ° C |
| α -Alkene | 4.46                       | 5.02    | 5.46    | 3.12    |
| Alkene    | 39.49                      | 45.53   | 49.46   | 52.78   |
| Alkane    | 54.48                      | 57.46   | 43.55   | 42.16   |
| Aromatics | 0.17                       | 0.31    | 0.39    | 0.74    |
| Others    | 1.40                       | 1.68    | 1.14    | 1.20    |
| Total     | 100.00                     | 100.00  | 100.00  | 100.00  |

**Table S3.** Liquid phase GC-MS table of catalytic pyrolysis of LDPE by ZSM-5 molecular sieve at 500 °C.

| component                | chemical formula               | respective percentages (%) |
|--------------------------|--------------------------------|----------------------------|
| n-Heptane                | C <sub>7</sub> H <sub>16</sub> | 0.23                       |
| 2-Methyl hexane          | C <sub>7</sub> H <sub>16</sub> | 0.07                       |
| 3-Methyl hexane          | C <sub>7</sub> H <sub>16</sub> | 0.23                       |
| 2,3-Dimethyl pentane     | C <sub>7</sub> H <sub>16</sub> | 0.06                       |
| 3-Heptene                | C <sub>7</sub> H <sub>14</sub> | 0.05                       |
| 3-Methyl 1-hexene        | C <sub>7</sub> H <sub>14</sub> | 0.63                       |
| 4-Methyl 1-hexene        | C <sub>7</sub> H <sub>14</sub> | 0.19                       |
| 3-Ethyl pentene          | C <sub>7</sub> H <sub>14</sub> | 0.12                       |
| n-Octane                 | C <sub>8</sub> H <sub>18</sub> | 0.12                       |
| 2-Methyl heptane         | C <sub>8</sub> H <sub>18</sub> | 0.10                       |
| 3-Methyl heptane         | C <sub>8</sub> H <sub>18</sub> | 0.11                       |
| 4-Methyl heptane         | C <sub>8</sub> H <sub>18</sub> | 0.37                       |
| 3-Ethyl hexane           | C <sub>8</sub> H <sub>18</sub> | 0.16                       |
| 2,3-Dimethyl hexane      | C <sub>8</sub> H <sub>18</sub> | 0.23                       |
| 2,4-Dimethyl hexane      | C <sub>8</sub> H <sub>18</sub> | 0.07                       |
| 2,5-Dimethyl hexane      | C <sub>8</sub> H <sub>18</sub> | 0.11                       |
| 3,4-Dimethyl hexane      | C <sub>8</sub> H <sub>18</sub> | 0.05                       |
| 3-Ethyl 2-methyl pentane | C <sub>8</sub> H <sub>18</sub> | 0.05                       |
| 2,3,4-Trimethyl pentane  | C <sub>8</sub> H <sub>18</sub> | 0.02                       |
| 4-Octene                 | C <sub>8</sub> H <sub>16</sub> | 2.37                       |
| n-Nonane                 | C <sub>9</sub> H <sub>20</sub> | 1.03                       |
| 2-Methyl octane          | C <sub>9</sub> H <sub>20</sub> | 0.24                       |
| 3-Methyl octane          | C <sub>9</sub> H <sub>20</sub> | 1.83                       |
| 4-Methyl octane          | C <sub>9</sub> H <sub>20</sub> | 1.86                       |
| 3-Ethyl heptane          | C <sub>9</sub> H <sub>20</sub> | 3.51                       |

|                              |                                 |       |
|------------------------------|---------------------------------|-------|
| 2,2-Dimethyl heptane         | C <sub>9</sub> H <sub>20</sub>  | 0.88  |
| 2,6-Dimethyl heptane         | C <sub>9</sub> H <sub>20</sub>  | 0.51  |
| 2,3,5-Trimethyl hexane       | C <sub>9</sub> H <sub>20</sub>  | 0.57  |
| 3-Ethyl 2,4-dimethyl pentane | C <sub>9</sub> H <sub>20</sub>  | 2.05  |
| 1-Nonene                     | C <sub>9</sub> H <sub>18</sub>  | 0.02  |
| n-Decane                     | C <sub>10</sub> H <sub>22</sub> | 0.27  |
| 3-Methyl nonane              | C <sub>10</sub> H <sub>22</sub> | 1.27  |
| 2,2-Dimethyl octane          | C <sub>10</sub> H <sub>22</sub> | 0.44  |
| 2,3-Dimethyl octane          | C <sub>10</sub> H <sub>22</sub> | 0.53  |
| 2,5-Dimethyl octane          | C <sub>10</sub> H <sub>22</sub> | 0.74  |
| 2,6-Dimethyl octane          | C <sub>10</sub> H <sub>22</sub> | 0.13  |
| 2,7-Dimethyl octane          | C <sub>10</sub> H <sub>22</sub> | 0.46  |
| 1-Decene                     | C <sub>10</sub> H <sub>22</sub> | 1.04  |
| Limonene                     | C <sub>10</sub> H <sub>16</sub> | 1.65  |
| 5-Undecene, (E)-             | C <sub>11</sub> H <sub>22</sub> | 0.24  |
| n-Undecane                   | C <sub>11</sub> H <sub>24</sub> | 1.51  |
| 6-Ethyl 2-methyl octane      | C <sub>11</sub> H <sub>24</sub> | 1.24  |
| Toluene                      | C <sub>7</sub> H <sub>8</sub>   | 11.56 |
| Ethylbenzene                 | C <sub>8</sub> H <sub>10</sub>  | 3.24  |
| (m,p)-Xylene                 | C <sub>8</sub> H <sub>10</sub>  | 7.37  |
| o-Xylene                     | C <sub>8</sub> H <sub>10</sub>  | 3.27  |
| Propylbenzene                | C <sub>9</sub> H <sub>12</sub>  | 0.24  |
| 1-Ethyl 2-methyl benzene     | C <sub>9</sub> H <sub>12</sub>  | 1.72  |
| 1-Ethyl 3-methyl benzene     | C <sub>9</sub> H <sub>12</sub>  | 0.24  |
| 1,2,3-Trimethyl benzene      | C <sub>9</sub> H <sub>12</sub>  | 1.98  |
| Cumene                       | C <sub>9</sub> H <sub>12</sub>  | 0.74  |
| 1,2,4-Trimethyl benzene      | C <sub>9</sub> H <sub>12</sub>  | 0.37  |
| 1,3,5-Trimethyl benzene      | C <sub>9</sub> H <sub>12</sub>  | 1.79  |
| 2-Ethyl 1,4-dimethyl benzene | C <sub>10</sub> H <sub>14</sub> | 0.94  |

|                                               |                                 |       |
|-----------------------------------------------|---------------------------------|-------|
| 2-Ethyl 3,5-dimethyl benzene                  | C <sub>10</sub> H <sub>14</sub> | 0.83  |
| 4-Ethyl 1,2-dimethyl benzene                  | C <sub>10</sub> H <sub>14</sub> | 0.72  |
| 1,2,3,5-Tetramethyl benzene                   | C <sub>10</sub> H <sub>14</sub> | 0.53  |
| 1,2,4,5-Tetramethyl benzene                   | C <sub>10</sub> H <sub>14</sub> | 0.83  |
| 2-Methyl 2-propenyl benzene                   | C <sub>10</sub> H <sub>12</sub> | 0.41  |
| <hr/>                                         |                                 |       |
| Naphthalene                                   | C <sub>10</sub> H <sub>8</sub>  | 1.26  |
| 1H-Indene, 1,1-dimethyl-                      | C <sub>11</sub> H <sub>12</sub> | 0.24  |
| 1,3-Diethyl 5-methyl benzene                  | C <sub>11</sub> H <sub>16</sub> | 0.48  |
| 1,1-Dimethyl propylbenzene                    | C <sub>11</sub> H <sub>16</sub> | 0.56  |
| Azulene                                       | C <sub>10</sub> H <sub>8</sub>  | 2.36  |
| 1-Methyl naphthalene                          | C <sub>11</sub> H <sub>10</sub> | 8.60  |
| 2-Methyl naphthalene                          | C <sub>11</sub> H <sub>10</sub> | 0.38  |
| Naphthalene, 2-ethyl-                         | C <sub>12</sub> H <sub>12</sub> | 12.88 |
| Naphthalene, 1,2,3,4-tetrahydro-1,4-dimethyl- | C <sub>12</sub> H <sub>16</sub> | 0.35  |
| Naphthalene, 1,4,6-trimethyl-                 | C <sub>13</sub> H <sub>14</sub> | 0.75  |
| Naphthalene, 1,4,6-trimethyl-                 | C <sub>13</sub> H <sub>14</sub> | 0.13  |
| Naphthalene, 1,6,7-trimethyl-                 | C <sub>13</sub> H <sub>14</sub> | 0.16  |
| Naphthalene, 1,4,6-trimethyl-                 | C <sub>13</sub> H <sub>14</sub> | 0.25  |
| Naphthalene, 2,3,6-trimethyl-                 | C <sub>13</sub> H <sub>14</sub> | 0.25  |
| Naphthalene, 1,6,7-trimethyl-                 | C <sub>13</sub> H <sub>14</sub> | 0.13  |
| Naphthalene, 2-methyl-1-propyl-               | C <sub>14</sub> H <sub>16</sub> | 0.23  |
| Anthracene, 2-methyl-                         | C <sub>15</sub> H <sub>12</sub> | 0.11  |
| Phenanthrene, 2,7-dimethyl-                   | C <sub>16</sub> H <sub>14</sub> | 0.05  |
| 4-Dodecene, (E)-                              | C <sub>12</sub> H <sub>24</sub> | 0.89  |
| 5-Dodecene, (E)-                              | C <sub>12</sub> H <sub>24</sub> | 0.45  |
| 6-Dodecene, (E)-                              | C <sub>12</sub> H <sub>24</sub> | 0.98  |
| 2-Methyl undecane                             | C <sub>12</sub> H <sub>26</sub> | 1.32  |
| 3-Methyl undecane                             | C <sub>12</sub> H <sub>26</sub> | 0.31  |
| 2,4-Dimethyl decane                           | C <sub>12</sub> H <sub>26</sub> | 0.15  |

|                     |                                 |        |
|---------------------|---------------------------------|--------|
| Tridecane           | C <sub>13</sub> H <sub>28</sub> | 0.72   |
| 3-Tetradecene, (E)- | C <sub>14</sub> H <sub>28</sub> | 1.92   |
| Total               |                                 | 100.00 |

**Table S4.** Liquid phase GC-MS table of catalytic pyrolysis of LDPE by HY molecular sieve at 500 °C.

| component                | chemical formula               | respective percentages (%) |
|--------------------------|--------------------------------|----------------------------|
| n-Heptane                | C <sub>7</sub> H <sub>16</sub> | 1.26                       |
| 2-Methyl hexane          | C <sub>7</sub> H <sub>16</sub> | 2.24                       |
| 3-Methyl hexane          | C <sub>7</sub> H <sub>16</sub> | 3.28                       |
| 2,3-Dimethyl pentane     | C <sub>7</sub> H <sub>16</sub> | 1.08                       |
| 3-Heptene                | C <sub>7</sub> H <sub>14</sub> | 1.33                       |
| 3-Methyl 1-hexene        | C <sub>7</sub> H <sub>14</sub> | 1.14                       |
| 4-Methyl 1-hexene        | C <sub>7</sub> H <sub>14</sub> | 1.43                       |
| 3-Ethyl pentene          | C <sub>7</sub> H <sub>14</sub> | 1.52                       |
| n-Octane                 | C <sub>8</sub> H <sub>18</sub> | 1.73                       |
| 2-Methyl heptane         | C <sub>8</sub> H <sub>18</sub> | 1.09                       |
| 3-Methyl heptane         | C <sub>8</sub> H <sub>18</sub> | 1.64                       |
| 4-Methyl heptane         | C <sub>8</sub> H <sub>18</sub> | 1.56                       |
| 3-Ethyl hexane           | C <sub>8</sub> H <sub>18</sub> | 1.04                       |
| 2,3-Dimethyl hexane      | C <sub>8</sub> H <sub>18</sub> | 0.62                       |
| 2,4-Dimethyl hexane      | C <sub>8</sub> H <sub>18</sub> | 1.09                       |
| 2,5-Dimethyl hexane      | C <sub>8</sub> H <sub>18</sub> | 1.64                       |
| 3,4-Dimethyl hexane      | C <sub>8</sub> H <sub>18</sub> | 1.56                       |
| 3-Ethyl 2-methyl pentane | C <sub>8</sub> H <sub>18</sub> | 1.04                       |
| 2,3,4-Trimethyl pentane  | C <sub>8</sub> H <sub>18</sub> | 1.22                       |
| 4-Octene                 | C <sub>8</sub> H <sub>16</sub> | 1.06                       |
| n-Nonane                 | C <sub>9</sub> H <sub>20</sub> | 1.24                       |
| 2-Methyl octane          | C <sub>9</sub> H <sub>20</sub> | 1.60                       |
| 3-Methyl octane          | C <sub>9</sub> H <sub>20</sub> | 1.06                       |
| 4-Methyl octane          | C <sub>9</sub> H <sub>20</sub> | 1.24                       |
| 3-Ethyl heptane          | C <sub>9</sub> H <sub>20</sub> | 1.60                       |
| 2,2-Dimethyl heptane     | C <sub>9</sub> H <sub>20</sub> | 1.60                       |
| 2,6-Dimethyl heptane     | C <sub>9</sub> H <sub>20</sub> | 1.02                       |
| 2,3,5-Trimethyl hexane   | C <sub>9</sub> H <sub>20</sub> | 1.24                       |



|                               |                                 |      |
|-------------------------------|---------------------------------|------|
| 3-Ethyl 2,4-dimethyl pentane  | C <sub>9</sub> H <sub>20</sub>  | 1.30 |
| 1-Nonene                      | C <sub>9</sub> H <sub>18</sub>  | 2.17 |
| 3-Decene                      | C <sub>10</sub> H <sub>20</sub> | 2.38 |
| n-Decane                      | C <sub>10</sub> H <sub>22</sub> | 1.51 |
| 3-Methyl nonane               | C <sub>10</sub> H <sub>22</sub> | 1.85 |
| 2,2-Dimethyl octane           | C <sub>10</sub> H <sub>22</sub> | 4.66 |
| 2,3-Dimethyl octane           | C <sub>10</sub> H <sub>22</sub> | 1.59 |
| 2,5-Dimethyl octane           | C <sub>10</sub> H <sub>22</sub> | 1.42 |
| 2,6-Dimethyl octane           | C <sub>10</sub> H <sub>22</sub> | 1.51 |
| 2,7-Dimethyl octane           | C <sub>10</sub> H <sub>22</sub> | 1.40 |
| 1-Decene                      | C <sub>10</sub> H <sub>22</sub> | 0.61 |
| n-Undecane                    | C <sub>11</sub> H <sub>24</sub> | 1.24 |
| Dodecane, 4-methyl-           | C <sub>13</sub> H <sub>28</sub> | 2.51 |
| Tridecane                     | C <sub>13</sub> H <sub>28</sub> | 2.88 |
| 3-Tridecene, (E)-             | C <sub>13</sub> H <sub>26</sub> | 1.02 |
| Toluene                       | C <sub>7</sub> H <sub>8</sub>   | 5.02 |
| Ethylbenzene                  | C <sub>8</sub> H <sub>10</sub>  | 0.26 |
| (m,p)-Xylene                  | C <sub>8</sub> H <sub>10</sub>  | 5.33 |
| o-Xylene                      | C <sub>8</sub> H <sub>10</sub>  | 0.82 |
| Propylbenzene                 | C <sub>9</sub> H <sub>12</sub>  | 2.23 |
| 1-Ethyl 2-methyl benzene      | C <sub>9</sub> H <sub>12</sub>  | 0.23 |
| 1-Ethyl 3-methyl benzene      | C <sub>9</sub> H <sub>12</sub>  | 0.24 |
| 1,2,3-Trimethyl benzene       | C <sub>9</sub> H <sub>12</sub>  | 1.18 |
| Cumene                        | C <sub>9</sub> H <sub>12</sub>  | 1.91 |
| 1,2,4-Trimethyl benzene       | C <sub>9</sub> H <sub>12</sub>  | 0.60 |
| 1,3,5-Trimethyl benzene       | C <sub>9</sub> H <sub>12</sub>  | 0.32 |
| 2-Ethyl 1,4-dimethyl benzene  | C <sub>10</sub> H <sub>14</sub> | 1.09 |
| 2-Ethyl 3,5-dimethyl benzene  |                                 | 0.64 |
| 4-Ethyl 1,2-dimethyl benzene  | C <sub>10</sub> H <sub>14</sub> | 1.26 |
| 1,2,3,5-Tetramethyl benzene   | C <sub>10</sub> H <sub>14</sub> | 1.04 |
| 1,2,4,5-Tetramethyl benzene   | C <sub>10</sub> H <sub>14</sub> | 0.62 |
| 1,3-Diethyl 5-methyl benzene  | C <sub>11</sub> H <sub>16</sub> | 0.29 |
| 1,1-Dimethyl propylbenzene    | C <sub>11</sub> H <sub>16</sub> | 0.33 |
| 2-Methyl 2-propenyl benzene   | C <sub>10</sub> H <sub>12</sub> | 0.26 |
| Naphthalene                   | C <sub>10</sub> H <sub>8</sub>  | 2.23 |
| Naphthalene, 2,6-dimethyl-    | C <sub>12</sub> H <sub>12</sub> | 1.76 |
| 2-Methyl naphthalene          | C <sub>11</sub> H <sub>10</sub> | 0.65 |
| Naphthalene, 1,6,7-trimethyl- | C <sub>13</sub> H <sub>14</sub> | 1.95 |
| Chamazulene                   | C <sub>14</sub> H <sub>16</sub> | 2.51 |

|       |     |
|-------|-----|
| Total | 100 |
|-------|-----|

**Table S5.** Liquid phase GC-MS table of catalytic pyrolysis of LDPE by MCM-41 molecular sieve at 500 °C.

| component             | chemical formula                | respective percentages (%) |
|-----------------------|---------------------------------|----------------------------|
| 3-Heptene             | C <sub>7</sub> H <sub>14</sub>  | 1.24                       |
| 3-Methyl 1-hexene     | C <sub>7</sub> H <sub>14</sub>  | 1.23                       |
| 4-Methyl 1-hexene     | C <sub>7</sub> H <sub>14</sub>  | 1.33                       |
| 3-Ethyl pentene       | C <sub>7</sub> H <sub>14</sub>  | 2.33                       |
| 4-Octene              | C <sub>8</sub> H <sub>16</sub>  | 1.23                       |
| cis-4-Nonene          | C <sub>9</sub> H <sub>18</sub>  | 1.21                       |
| 3-Nonene, (E)-        | C <sub>9</sub> H <sub>18</sub>  | 1.24                       |
| Cyclopentane, pentyl- | C <sub>10</sub> H <sub>20</sub> | 1.39                       |
| trans-4-Decene        | C <sub>10</sub> H <sub>20</sub> | 2.46                       |
| 3-Undecene, (E)-      | C <sub>11</sub> H <sub>22</sub> | 1.58                       |
| 4-Undecene, (Z)-      | C <sub>11</sub> H <sub>22</sub> | 1.15                       |
| 5-Undecene, (E)-      | C <sub>11</sub> H <sub>22</sub> | 1.37                       |
| 3-Dodecene, (Z)-      | C <sub>12</sub> H <sub>24</sub> | 1.47                       |
| 4-Dodecene            | C <sub>12</sub> H <sub>24</sub> | 1.17                       |
| 5-Dodecene, (E)-      | C <sub>12</sub> H <sub>24</sub> | 1.24                       |
| 1-Tridecene           | C <sub>13</sub> H <sub>26</sub> | 2.17                       |
| 3-Tridecene, (Z)-     | C <sub>13</sub> H <sub>26</sub> | 1.24                       |
| 5-Tridecene, (E)-     | C <sub>13</sub> H <sub>26</sub> | 2.90                       |
| 3-Tetradecene, (E)-   | C <sub>14</sub> H <sub>28</sub> | 2.27                       |
| 5-Tetradecene, (E)-   | C <sub>14</sub> H <sub>28</sub> | 2.42                       |
| 7-Tetradecene, (E)-   | C <sub>14</sub> H <sub>28</sub> | 2.57                       |
| Tetradecane           | C <sub>14</sub> H <sub>30</sub> | 2.86                       |
| 1-Pentadecene         | C <sub>15</sub> H <sub>30</sub> | 3.24                       |

|                                     |                                 |       |
|-------------------------------------|---------------------------------|-------|
| Cetene                              | C <sub>16</sub> H <sub>32</sub> | 15.27 |
| Hexadecane                          | C <sub>16</sub> H <sub>34</sub> | 8.65  |
| 3-Heptadecene, (Z)-                 | C <sub>17</sub> H <sub>34</sub> | 3.57  |
| 8-Heptadecene                       | C <sub>17</sub> H <sub>34</sub> | 2.24  |
| 3-Octadecene, (E)-                  | C <sub>18</sub> H <sub>36</sub> | 2.24  |
| 5-Octadecene, (E)-                  | C <sub>18</sub> H <sub>36</sub> | 2.13  |
| 1-Nonadecene                        | C <sub>19</sub> H <sub>38</sub> | 2.26  |
| 3-Eicosene, (E)-                    | C <sub>20</sub> H <sub>40</sub> | 12.37 |
| 5-Eicosene, (E)-                    | C <sub>20</sub> H <sub>40</sub> | 3.26  |
| 9-Eicosene, (E)-                    | C <sub>20</sub> H <sub>40</sub> | 2.33  |
| Cyclohexadecane, 1,2-diethyl-       | C <sub>20</sub> H <sub>40</sub> | 2.30  |
| Oxalic acid, hexadecyl propyl ester | C <sub>20</sub> H <sub>40</sub> | 2.12  |
| Total                               |                                 | 100   |
